# Supplementary material for: Dupilumab Treatment of Atopic Dermatitis in Routine Clinical Care: Baseline Characteristics of Patients in the PROLEAD Prospective, Observational Study
Source: Springer Nature journal article supplement (doi:10.1007/s13555-022-00791-1), 2022-08-19
Supplement: MOESM1 [file 23382452]

## SUPPLEMENTARY MATERIAL

### **Dupilumab Treatment of Atopic Dermatitis in Routine Clinical Care: Baseline Characteristics of Patients in the PROLEAD Prospective, Observational Study**

Diamant Thaçi<sup>1</sup>, Andrea Bauer<sup>2</sup>, Ralph von Kiedrowski<sup>3</sup>, Florian Schenck<sup>4</sup>, Konstantin Ertner<sup>5</sup>, Sophie Möller<sup>6</sup>, Anja Fait<sup>7</sup>, Mike Bastian<sup>7</sup>, Matthias Augustin<sup>8</sup>

<sup>1</sup>*Institute and Comprehensive Centre for Inflammatory Medicine, University of Luebeck, Luebeck, Germany*

<sup>2</sup>*Department of Dermatology, University Allergy Center, University Hospital Carl Gustav Carus, Technical University, Dresden, Germany*

<sup>3</sup>*Company for Medical Study & Service Selters GmbH and Dermatology Practice Dr von Kiedrowski, Selters (Westerwald), Germany*

<sup>4</sup>*Hautärzte Zentrum Hannover, Hannover, Germany*

<sup>5</sup>*Hautarztpraxis Dr Ertner, Nürnberg, Germany*

<sup>6</sup>*Sanofi, Berlin, Germany*

<sup>7</sup>*Sanofi, Frankfurt, Germany*

<sup>8</sup>*Institute of Health Care Research in Dermatology and Nursing, University Medical Center Hamburg-Eppendorf, Hamburg, Germany*

#### **Corresponding author:**

Diamant Thaçi, Institute and Comprehensive Centre for Inflammatory Medicine, University of Luebeck, Ratzeburger Alee 160, 23538 Luebeck, Germany

Phone: +49 451 500 41600; Email: [Diamant.Thaci@uksh.de](mailto:Diamant.Thaci@uksh.de)

**Supplementary Table 1: Family history of type 2 inflammatory diseases (*n* = 817)**

| <b>Manifestation, %</b> | <b>Yes</b> | <b>No</b> | <b>Missing/unknown</b> |
|-------------------------|------------|-----------|------------------------|
| Allergic rhinitis       | 45.8       | 38.8      | 15.4                   |
| Atopic dermatitis       | 40.4       | 46.3      | 13.3                   |
| Asthma                  | 26.3       | 59.9      | 13.8                   |
| Dust mite allergy       | 25.5       | 45.4      | 29.1                   |
| Food allergy            | 24.9       | 50.3      | 24.8                   |
| Nasal polyps            | 13.6       | 50.9      | 35.5                   |

AD, atopic dermatitis.

**Supplementary Table 2: Burden of disease (hospitalisations, exacerbations, and treatments) at baseline (*n* = 817)**

| <b>Outcome</b>                                                                                       | <b>Mean</b> | <b>SD</b> | <b>Median</b> | <b>IQR</b> | <b><i>n</i></b> |
|------------------------------------------------------------------------------------------------------|-------------|-----------|---------------|------------|-----------------|
| Number of exacerbations experienced in the past 12 months                                            | 6.1         | 9.1       | 4.0           | 2.0–8.0    | 813             |
| Number of inpatient nights in the hospital in the past 24 months for the treatment of AD             | 2.1         | 6.4       | 0             | 0–0        | 817             |
| Number of days in the day hospital in the past 24 months for the treatment of AD                     | 0.8         | 4.9       | 0             | 0–0        | 816             |
| Number of visits to the hospital outpatient department in the past 24 months for the treatment of AD | 1.1         | 3.5       | 0             | 0–0        | 817             |
| Number of days receiving UV therapy in the past 24 months                                            | 5.3         | 14.6      | 0             | 0–1.0      | 814             |

AD, atopic dermatitis; IQR, interquartile range; *n*, number of patients; SD, standard deviation; UV ultraviolet.

**Supplementary Table 3: Patient questionnaire at baseline: effort and financial burden due to AD (*n* = 817)**

| <b>Question</b>                                                                                                     | <b>Mean</b> | <b>SD</b> | <b>Median</b> | <b>IQR</b> | <b><i>n</i></b> |
|---------------------------------------------------------------------------------------------------------------------|-------------|-----------|---------------|------------|-----------------|
| In the last 12 months, how many times did you visit a physician because of your AD?                                 | 8.2         | 7.6       | 6.0           | 4.0–10.0   | 709             |
| How much money (€) do you spend every month in addition to the prescribed medications for the treatment of your AD? | 56.96       | 58.22     | 40.00         | 20.0–70.0  | 718             |

AD, atopic dermatitis; IQR, interquartile range; *n*, number of patients.

**Supplementary Fig. 1: Age at baseline according to sex (categorical) ( $n = 817$ )**

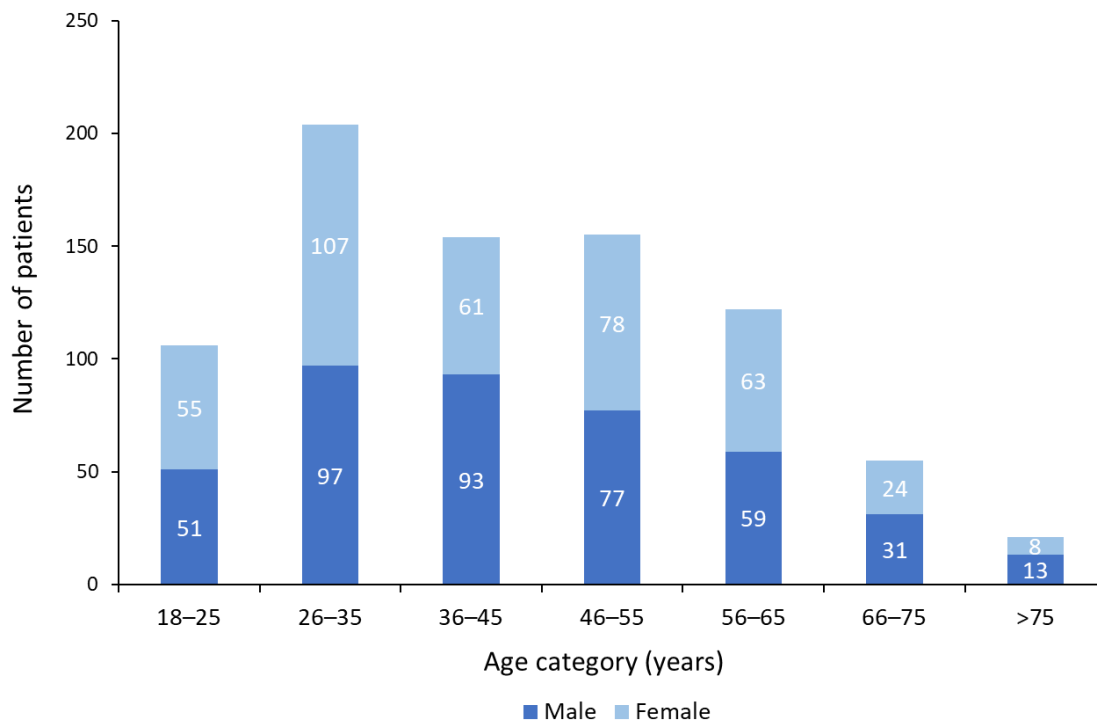

$n$ , number of patients.

**Supplementary Fig. 2 A) clinical eligibility criteria for systemic treatment<sup>6</sup>; B) recruited PROLEAD patients fulfilling checklist criteria (n = 817)**

**A)**

| Clinical eligibility criteria for systemic treatment |                                                                                                                                    | Yes      | No |
|------------------------------------------------------|------------------------------------------------------------------------------------------------------------------------------------|----------|----|
| <b>A: Relevant objective severity</b>                | Is present, since <u>at least one</u> of the following criteria is fulfilled:                                                      | <b>0</b> |    |
|                                                      | • PGA of severity is at least three on the five-point scale, <u>or</u>                                                             | 0        | 0  |
|                                                      | • EASI > 15 <u>or</u>                                                                                                              | 0        | 0  |
|                                                      | • SCORAD >40/ oSCORAD >20 <u>or</u>                                                                                                | 0        | 0  |
|                                                      | • Treatment-refractory affection of >10% of BSA <u>or</u>                                                                          | 0        | 0  |
|                                                      | • Treatment-refractory eczema in sensitive/visible areas, <u>or</u>                                                                | 0        | 0  |
|                                                      | • High-frequency of relapses (>10/year) with current treatment, <u>or</u>                                                          | 0        | 0  |
| <b>B: Relevant subjective burden</b>                 | Is present, since <u>at least one</u> of the following criteria is fulfilled:                                                      | <b>0</b> |    |
|                                                      | • DLQI >10, <u>or</u>                                                                                                              | 0        | 0  |
|                                                      | • Pruritus >6 (on VAS or NRS ranging from 0–10) <u>or</u>                                                                          | 0        | 0  |
|                                                      | ○ Relevant sleep disturbance at night due to eczema/pruritus                                                                       | 0        | 0  |
| <b>C: Lack of treatment response</b>                 | All other approaches except systemic treatment are insufficient, since <u>at least one</u> of the following criteria is fulfilled: | <b>0</b> |    |
|                                                      | • No satisfactory response to topical or phototherapy <u>or</u>                                                                    | 0        | 0  |
|                                                      | • No expectation of success with topical measures alone <u>or</u>                                                                  | 0        | 0  |
|                                                      | Patient has already received one indicated systemic treatment unsuccessfully                                                       | 0        | 0  |
|                                                      | • Contra-indication/no response/loss of efficacy/adverse events                                                                    |          |    |

**B)**

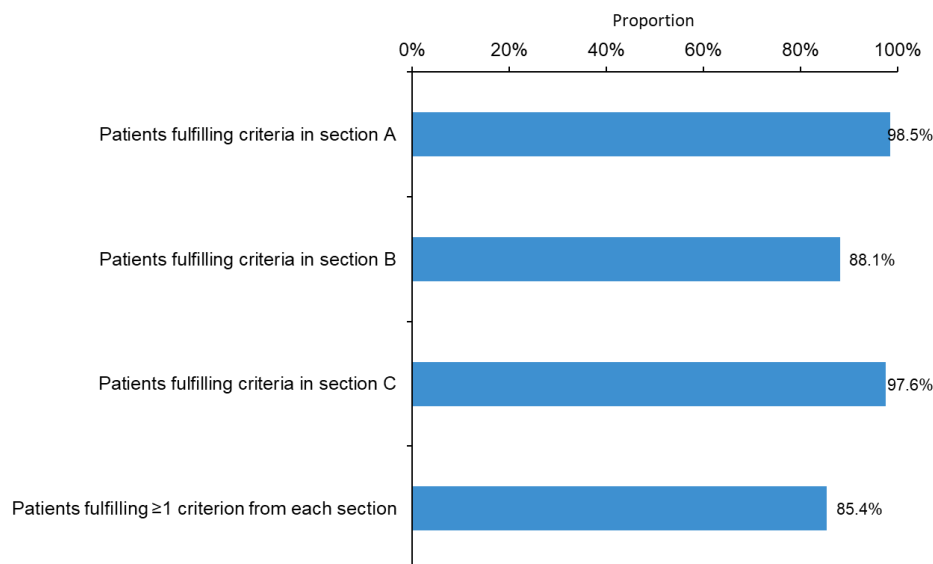

BSA, body surface area; DLQI, Dermatology Life Quality Index; EASI, eczema area and severity index; *n*, number of patients; NRS, numeric rating scale; oSCORAD, objective-SCORAD; PGA, physician's global assessment; SCORAD, scoring AD; VAS, visual analogue scale.
